# Supplementary material
Source: PubMed Central journal article supplement (PMC7487203)
Supplement: mmc1.pdf [file mmc1.pdf]

Survey Code: .....

Village name: .....

Date: .....

### Phone survey enquiring on immediate impacts of COVID-19 (& TC Harold) in coastal communities

|                                                                                                                                                                                                                                                                                                                                                                                                                                                                                                                                                                          |                                                                                                                                                                                                                                                                                                                                                                                   |
|--------------------------------------------------------------------------------------------------------------------------------------------------------------------------------------------------------------------------------------------------------------------------------------------------------------------------------------------------------------------------------------------------------------------------------------------------------------------------------------------------------------------------------------------------------------------------|-----------------------------------------------------------------------------------------------------------------------------------------------------------------------------------------------------------------------------------------------------------------------------------------------------------------------------------------------------------------------------------|
| Respondent's details:                                                                                                                                                                                                                                                                                                                                                                                                                                                                                                                                                    |                                                                                                                                                                                                                                                                                                                                                                                   |
| Name:                                                                                                                                                                                                                                                                                                                                                                                                                                                                                                                                                                    | Tel. #:                                                                                                                                                                                                                                                                                                                                                                           |
| Position in village:                                                                                                                                                                                                                                                                                                                                                                                                                                                                                                                                                     | Gender: <input type="checkbox"/> Male <input type="checkbox"/> Female                                                                                                                                                                                                                                                                                                             |
| <p><i>Prompt:</i><br/> <i>We are calling to check in with you how life is in your village now, following the recent COVID-19 measures taken by the government and the events of TC Harold. We would like to ask you some questions on what is happening in your village now and how people are coping? We will keep all answers anonymous and if you would like to stop, or withdraw from the interview, you are free to do so at any point. We will use this data only with your permission and will ensure that we share the results from the survey with you.</i></p> |                                                                                                                                                                                                                                                                                                                                                                                   |
| Any special notes:                                                                                                                                                                                                                                                                                                                                                                                                                                                                                                                                                       |                                                                                                                                                                                                                                                                                                                                                                                   |
| 1. Has population changed because of COVID or TC Harold, and if so, by how much do you estimate?<br><i>(if it is more, ask to estimate how much more by circling)</i>                                                                                                                                                                                                                                                                                                                                                                                                    | <input type="checkbox"/> Less <input type="checkbox"/> Same <input type="checkbox"/> More: 25% 50% 75% 100%                                                                                                                                                                                                                                                                       |
| 2. What government COVID-19 measures were adopted in the village?                                                                                                                                                                                                                                                                                                                                                                                                                                                                                                        | Notes:                                                                                                                                                                                                                                                                                                                                                                            |
| 2.1 How have the government COVID-19 measures impacted life in the village?                                                                                                                                                                                                                                                                                                                                                                                                                                                                                              | Notes:                                                                                                                                                                                                                                                                                                                                                                            |
| 3. Did TC Harold affect your village at all?                                                                                                                                                                                                                                                                                                                                                                                                                                                                                                                             | <input type="checkbox"/> YES <input type="checkbox"/> NO                                                                                                                                                                                                                                                                                                                          |
| 3.1 Was there any damage to housing? If so, how much damage was there?                                                                                                                                                                                                                                                                                                                                                                                                                                                                                                   | <input type="checkbox"/> Extreme damage<br>all houses damaged or were completely destroyed<br><input type="checkbox"/> Serious damage<br>50% of houses damaged or were completely destroyed<br><input type="checkbox"/> Some damage<br>25% of houses damaged or were completely destroyed<br><input type="checkbox"/> No damage<br>no houses damaged or were completely destroyed |
| 3.2 Does the village have enough drinking water?                                                                                                                                                                                                                                                                                                                                                                                                                                                                                                                         | Notes:                                                                                                                                                                                                                                                                                                                                                                            |
| 4. Do you think there is enough food in the village for everyone?                                                                                                                                                                                                                                                                                                                                                                                                                                                                                                        | Notes:                                                                                                                                                                                                                                                                                                                                                                            |
| 5. How are people making food last for everyone?                                                                                                                                                                                                                                                                                                                                                                                                                                                                                                                         | Notes:                                                                                                                                                                                                                                                                                                                                                                            |
| 6. Are people producing more food than normal, if so how?                                                                                                                                                                                                                                                                                                                                                                                                                                                                                                                | Notes:                                                                                                                                                                                                                                                                                                                                                                            |
| 7. What kind of food is most important have during these times?                                                                                                                                                                                                                                                                                                                                                                                                                                                                                                          | Notes:                                                                                                                                                                                                                                                                                                                                                                            |
| 8. What about fishing, are more people fishing?                                                                                                                                                                                                                                                                                                                                                                                                                                                                                                                          | Notes:                                                                                                                                                                                                                                                                                                                                                                            |
| 9. Is more fish being caught in total?<br><i>(if it is more, ask to estimate how much more by circling)</i>                                                                                                                                                                                                                                                                                                                                                                                                                                                              | <input type="checkbox"/> Less <input type="checkbox"/> Same <input type="checkbox"/> More: 25% 50% 75% 100%                                                                                                                                                                                                                                                                       |
| 10. Has there been any changes in the sales of fish?                                                                                                                                                                                                                                                                                                                                                                                                                                                                                                                     | 10.1 In the village:<br><input type="checkbox"/> Less <input type="checkbox"/> Same <input type="checkbox"/> More                                                                                                                                                                                                                                                                 |
|                                                                                                                                                                                                                                                                                                                                                                                                                                                                                                                                                                          | 10.2 Out the village:<br><input type="checkbox"/> Less <input type="checkbox"/> Same <input type="checkbox"/> More                                                                                                                                                                                                                                                                |
| 11. Has there been any changes to the price of fish?                                                                                                                                                                                                                                                                                                                                                                                                                                                                                                                     | <input type="checkbox"/> Cheaper <input type="checkbox"/> More expensive                                                                                                                                                                                                                                                                                                          |
| 12. Has there been any changes to the price of rice?                                                                                                                                                                                                                                                                                                                                                                                                                                                                                                                     | Price (e.g. Vt per kg):                                                                                                                                                                                                                                                                                                                                                           |
| 13. Has there been any changes to the price of tinned tuna?                                                                                                                                                                                                                                                                                                                                                                                                                                                                                                              | Price for medium-sized tin:                                                                                                                                                                                                                                                                                                                                                       |
| 14. Any other changes about fishing?<br><i>(e.g. new species, open tabu erias, different methods, conflicts over fishing?,</i>                                                                                                                                                                                                                                                                                                                                                                                                                                           | Notes:                                                                                                                                                                                                                                                                                                                                                                            |
| 15. Are there any other challenges that are happening in the village?                                                                                                                                                                                                                                                                                                                                                                                                                                                                                                    | Notes:                                                                                                                                                                                                                                                                                                                                                                            |
